# Supplementary material
Source: PubMed Central journal article supplement (PMC1172279)

PAG3.155  
PAG3.112  
water

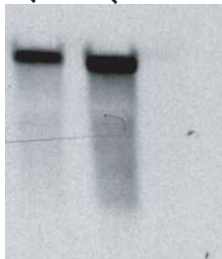

← *Rluc-Fluc*

Supplement: pnas_0504132102_1.pdf [file pnas_0504132102_1.pdf]

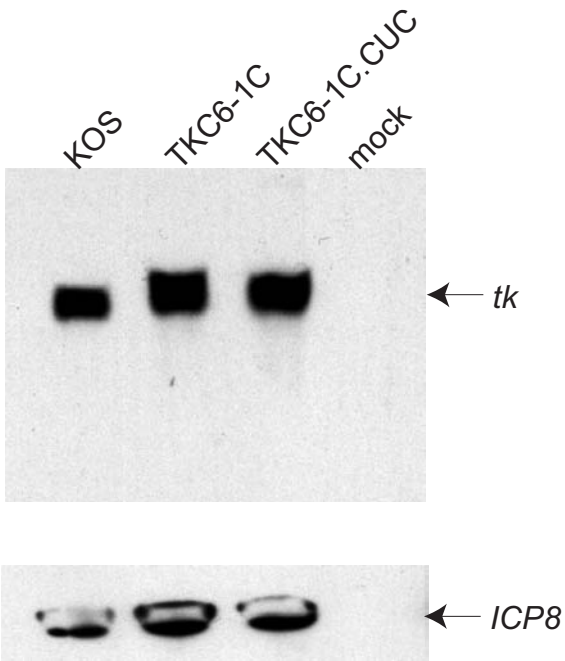

Supplement: pnas_0504132102_2.pdf [file pnas_0504132102_2.pdf]
